# Supplementary material for: Catalytic activity of a microporous–mesoporous composite towards liquid phase oxidation of diphenylmethane
Source: Royal Society of Chemistry journal article supplement (doi:10.1039/d1nj03577k), 2021-01-01

## Supporting Information

### **Catalytic activity of microporous-mesoporous composite towards liquid phase oxidation of diphenylmethane**

Priyanka Kalita,<sup>a</sup> Doli Rani Das,<sup>a</sup> Debojit Hazarika<sup>b</sup> and Anup Kumar Talukdar<sup>a\*</sup>

<sup>a</sup>Department of Chemistry, Gauhati University, Guwahati-781014, Assam, India

<sup>b</sup>Cotton University, Guwahati-781001, Assam, India

Email: [priyankakalita33@gmail.com](mailto:priyankakalita33@gmail.com), [guchem.talukdar@gmail.com](mailto:guchem.talukdar@gmail.com)

| Contents:                                                                            | Page |
|--------------------------------------------------------------------------------------|------|
| General information                                                                  | 2    |
| Fig1: EDX spectrum of ZSM-5                                                          | 3    |
| Fig2: EDX spectrum of ZSM-5/MCM-41 composite                                         | 3    |
| Fig3: EDX spectrum of CZM-5                                                          | 3    |
| Table1: Amount of metal ion (Co) present in the prepared samples (wt%) from EDX data | 4    |
| Fig4: Leaching test for CZM-5 catalyst for conversion of diphenylmethane             | 4    |
| Fig5: XRD pattern of (a) fresh CZM-5 (b) Spent CZM-5 catalyst                        | 5    |
| Experimental Procedure                                                               | 5    |
| Copies of <sup>1</sup> H and <sup>13</sup> C NMR spectra                             | 6    |

## General Information

Fumed silica (Sigma Aldrich), sodium aluminate (Kemphasol), sodium hydroxide (Merck), tetrapropylammonium bromide (Merck), cobaltous nitrate, CTAB (Rankem) were used for the synthesis of ZSM-5, ZSM-5/MCM-41 composite and Co loaded ZSM-5/MCM-41 composites. All the chemicals used were of analytical grade and obtained from commercial sources and used without further purification. Double distilled water was used throughout the experimental processes.

The synthesized materials were characterized by various techniques such as powder X-ray diffraction, TGA, IR spectroscopy, UV-VIS DRS spectroscopy, SEM and EDX and N<sub>2</sub> adsorption-desorption analysis. The phase formation and crystallographic state of the synthesized samples were studied by Powder X-ray diffraction (PXRD) pattern and were recorded using a Rigaku Ultima IV X-Ray diffractometer (Cu K $\alpha$  radiation,  $\lambda=1.5418$  Å) at 40 kV and 40 mA. The FTIR spectra were recorded in the range 4000-400 cm<sup>-1</sup> using an IR Affinity-1 Fourier transform infrared spectrophotometer (SHIMADZU) using a KBr pallet. Thermogravimetric analysis (TGA) was done using Mettler Toledo TGA/DSC1 STAR<sup>e</sup> system in presence of N<sub>2</sub> atmosphere in the temperature range 50-700 °C at a heating rate of 10 °C/min. The N<sub>2</sub> adsorption-desorption isotherm of the prepared samples were recorded at 77 K by using Micromeritics Tristar 3000 analyser. Prior to the measurement the samples were degassed at 110 °C for 4 h. To investigate the morphology and the presence of different elements in the synthesized samples scanning electron micrographs (SEM) and energy dispersive X –ray spectroscopic (EDX) analysis were recorded. The images were recorded in Zeiss SIGMA 300 scanning electron microscope. Diffuse reflectance UV–Vis spectra (DRS) of the Co loaded ZSM-5/MCM-41 samples were recorded with a Hitachi 4100 spectrometer in the range of 200–800 nm using barium sulphate as the standard reference for baseline correction. Finally, the products of the oxidation reaction were analysed using Perkin Elmer Clarus 500 gas chromatograph equipped with Elite-1 series of capillary column using flame ionization detector (FID). <sup>1</sup>H and <sup>13</sup>C spectra of the isolated product were recorded on a Bruker 500 MHz spectrometer. Chemical shifts are given in  $\delta$  units relative to the tetramethylsilane (TMS) signal as an internal reference in CDCl<sub>3</sub>.

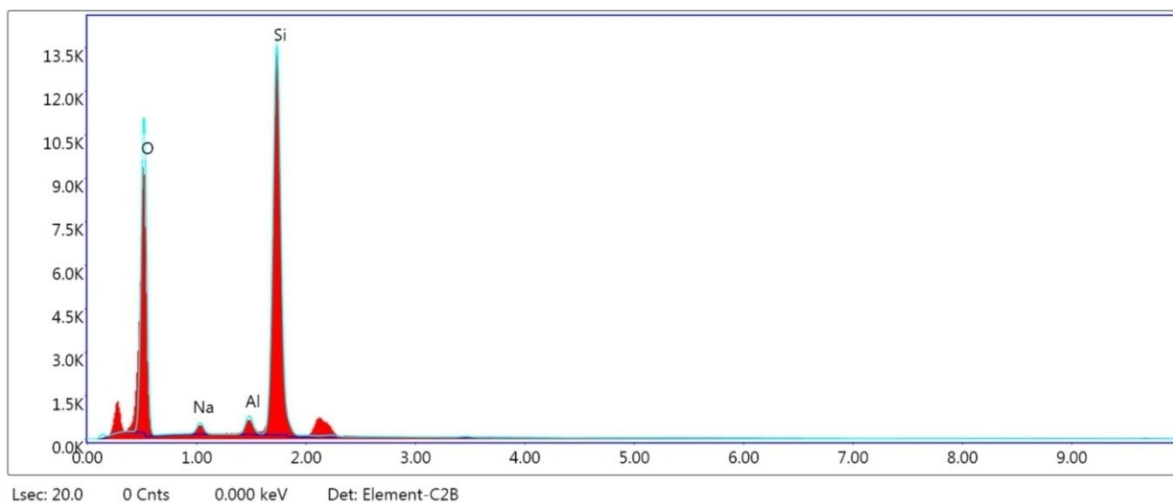

Fig1: EDX spectrum of ZSM-5

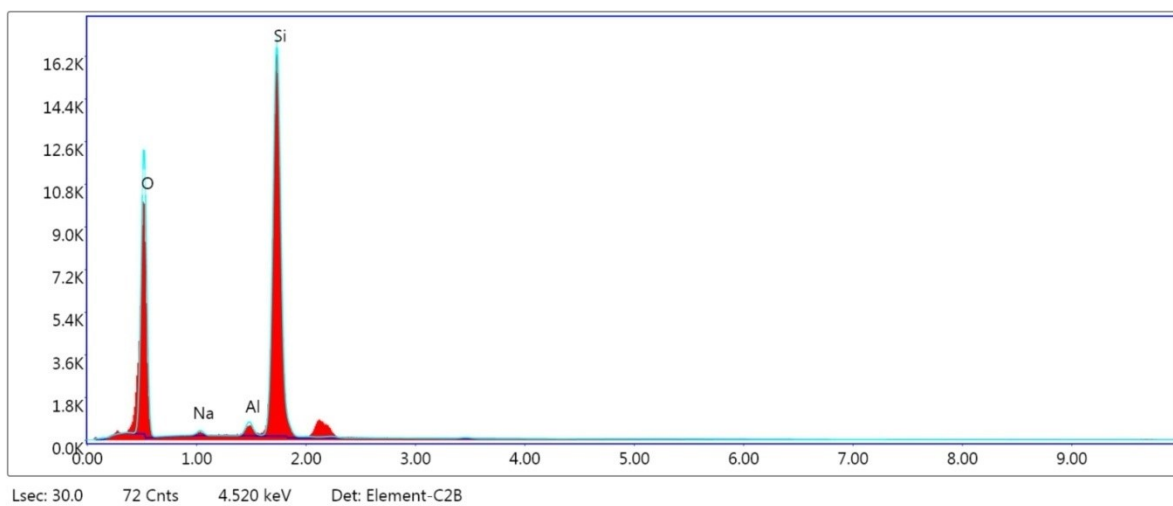

Fig 2: EDX spectrum of ZSM-5/MCM-41 composite

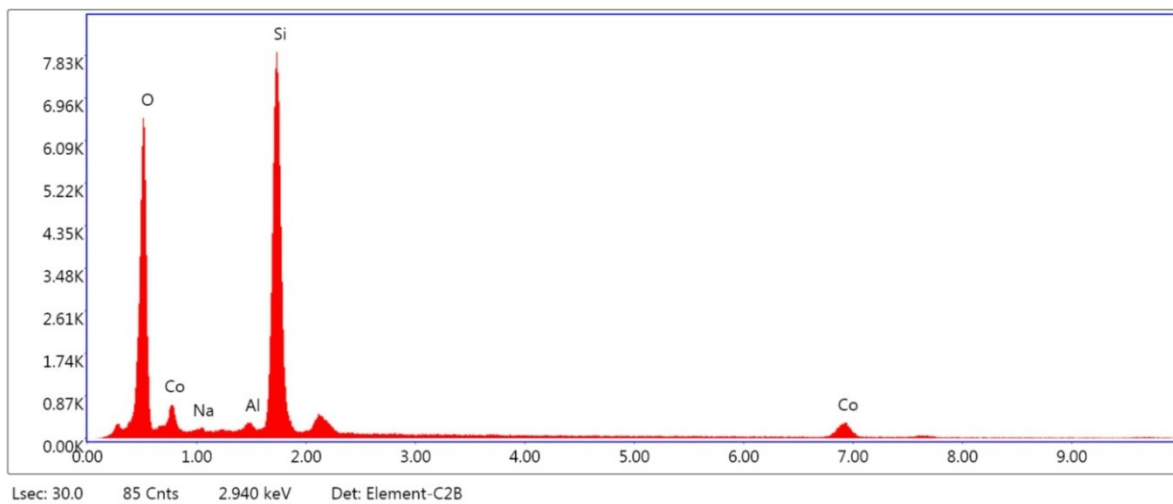

Fig 3: EDX spectrum of CZM-5

**Table 1: Amount of metal ion (Co) present in the prepared samples (wt%)(EDX data)**

| Entry | Sample designation | Amount of metal ion (Co) in the samples (wt%) (EDX data) |
|-------|--------------------|----------------------------------------------------------|
| 1     | CZM-1              | 0.97                                                     |
| 2     | CZM-3              | 2.45                                                     |
| 3     | CZM-5              | 4.29                                                     |
| 4     | CZM-8              | 7.20                                                     |
| 5     | CZM-10             | 8.95                                                     |

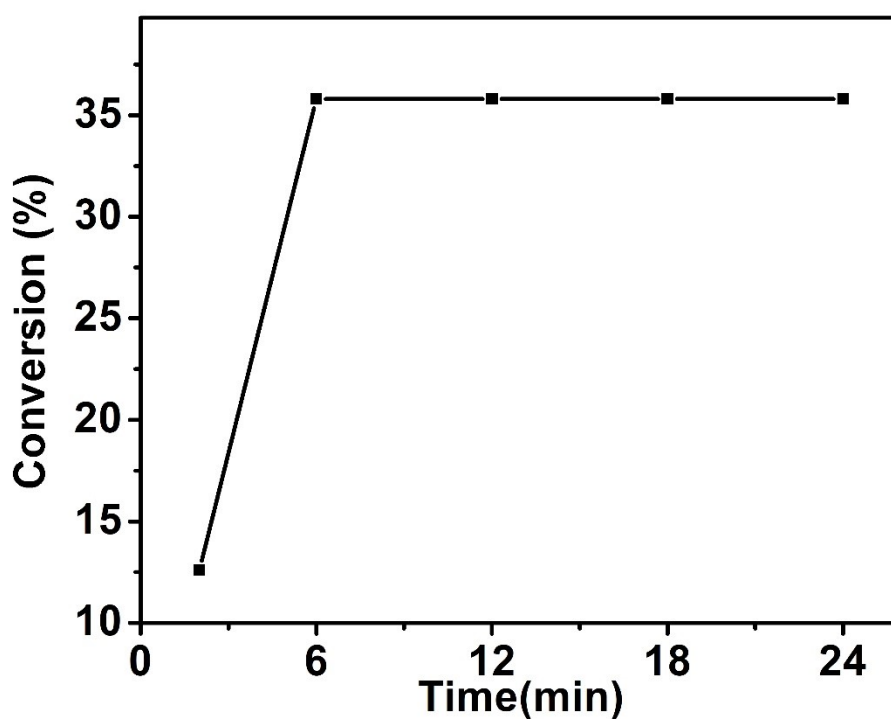

Fig 4: Leaching test for CZM-5 catalyst for conversion of diphenylmethane

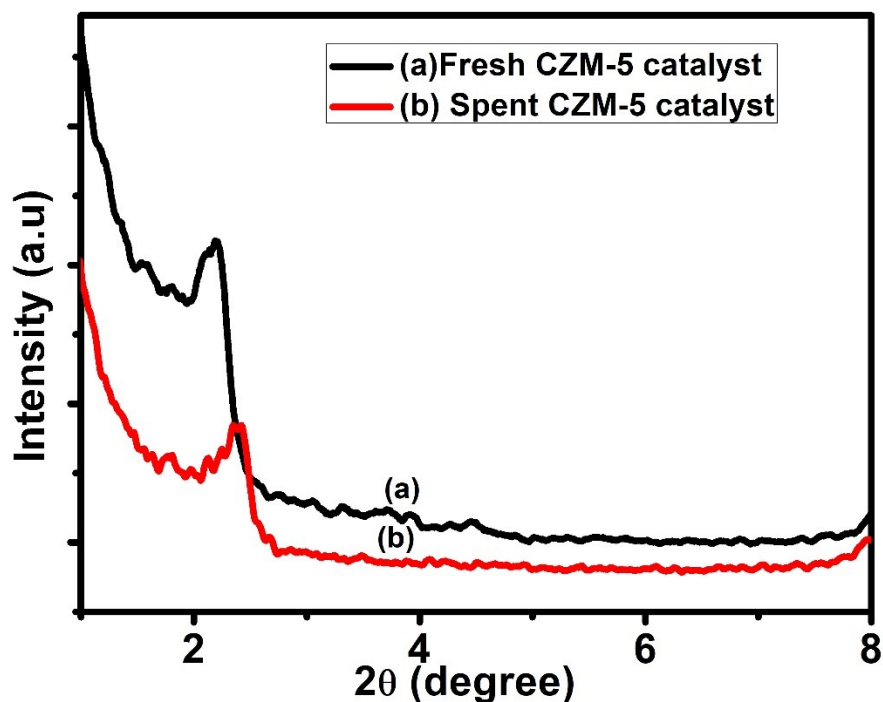

Fig 5: XRD pattern of (a) fresh CZM-5 (b) Spent CZM-5 catalyst

### Experimental procedure

To a solution of DPM (6 mmol) in acetonitrile (5 mL), TBHP (6 mmol) was added and the temperature was set to 80 °C. Then 9 wt% of the catalyst w. r. t DPM was added slowly to the reaction mixture and the reaction was allowed to run for 24 h under reflux condition. After completion of the reaction, the reaction mixture was diluted with dichloromethane and filtered. The organic layer was washed several times with water, separated and treated with anhydrous Na<sub>2</sub>SO<sub>4</sub>. The solvent was removed under reduced pressure and the residue was purified by column chromatography using hexane:ethyl acetate (9:1) as eluent in silica gel 100-200 mesh to afford the pure product benzophenone as white solid with 68% isolated yield [m.p. 45-47 °C; <sup>1</sup>H NMR (500 MHz, CDCl<sub>3</sub>) δ 7.75-7.74 (m, 4H), 7.49 (t, J = 7.37 Hz, 4H), 7.39 (t, J = 7.89 Hz, 4H); <sup>13</sup>C NMR (125 MHz, CDCl<sub>3</sub>) δ 196.4, 137.6, 132.4, 130.0, 128.3].

Copies of  $^1\text{H}$  and  $^{13}\text{C}$  NMR spectra:

### $^1\text{H}$ -NMR benzophenone

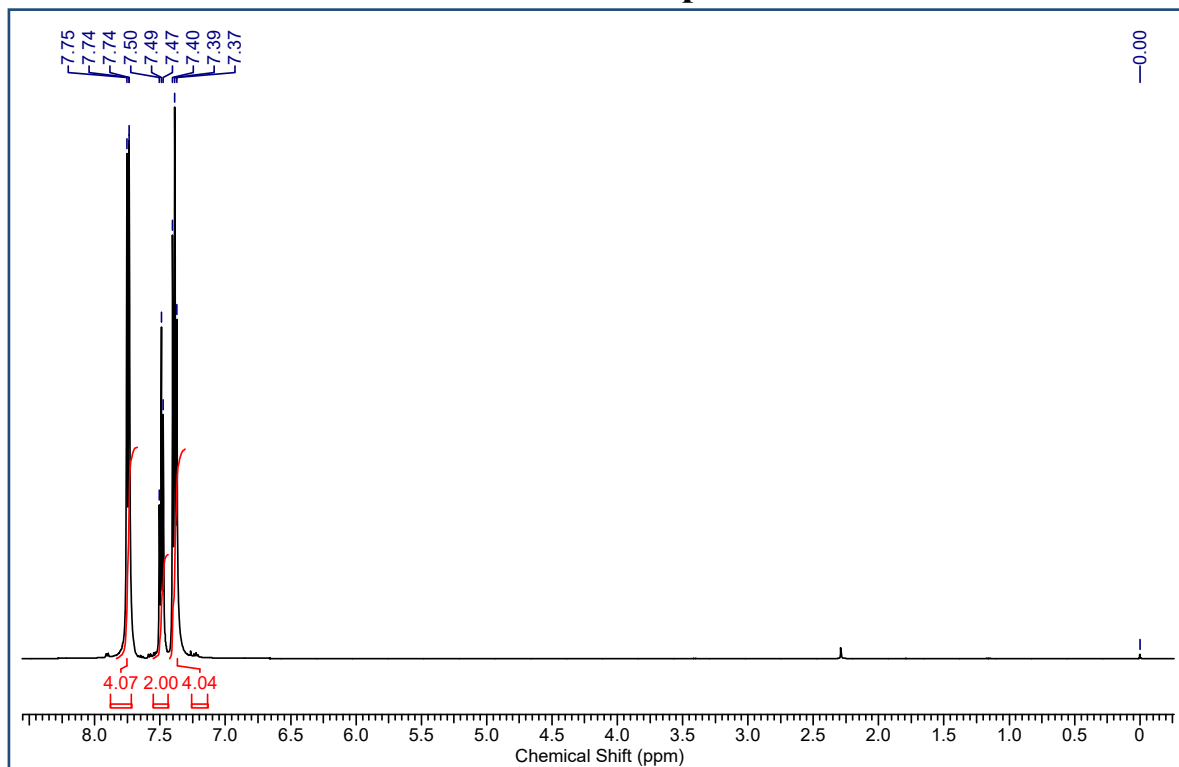

### $^{13}\text{C}$ -NMR of benzophenone

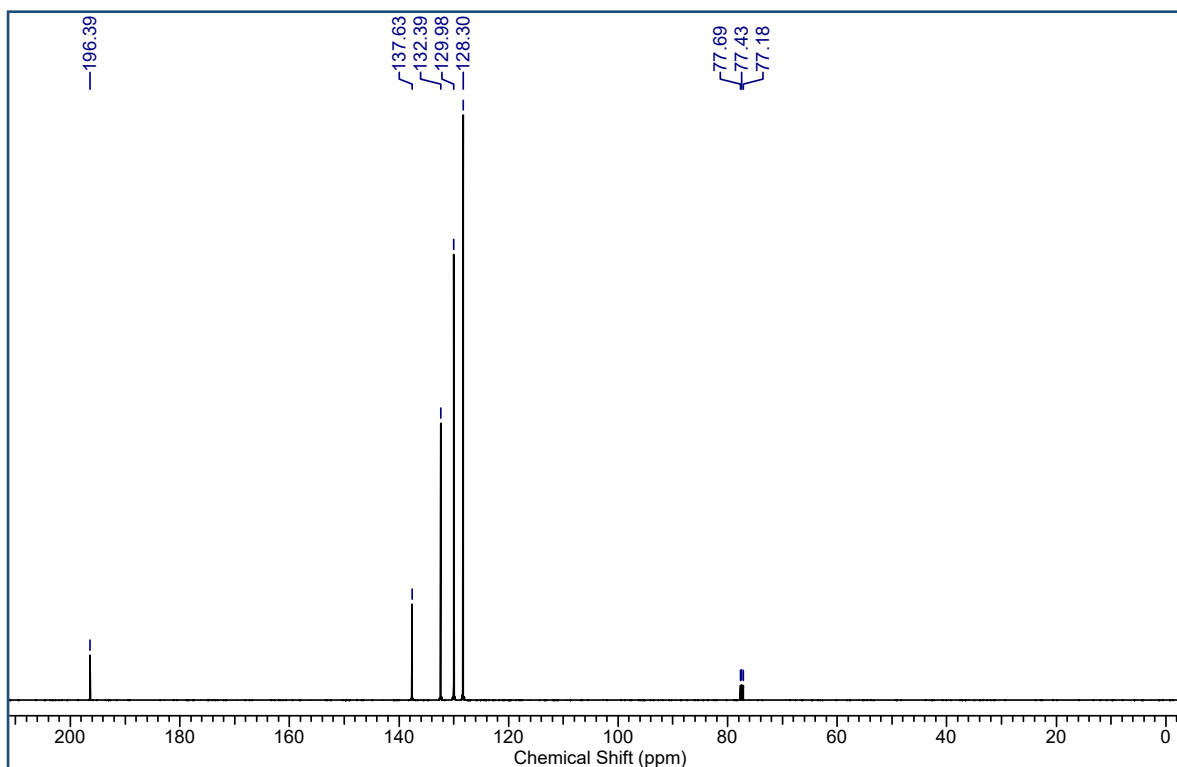

Supplement: d1nj03577k1.pdf [file d1nj03577k1.pdf]
